# Supplementary material for: Polyelectrolytes-assisted layer-by-layer assemblies of graphene oxide and dye on glass substrate
Source: Royal Society of Chemistry journal article supplement (doi:10.1039/c4ra16921b), 2015-01-01
Supplement: c4ra16921b1.pdf [file c4ra16921b1.pdf]

Electronic Supplementary Information (ESI)  
For

**Polyelectrolytes-assisted Layer-by-layer  
Assemblies of Graphene Oxide and Dye on  
Glass Substrate**

*Ayşe Merve Aslandaş, Yavuz Onganer, Kadem Meral*

Department of Chemistry, Atatürk University, 25240, Erzurum, Turkey

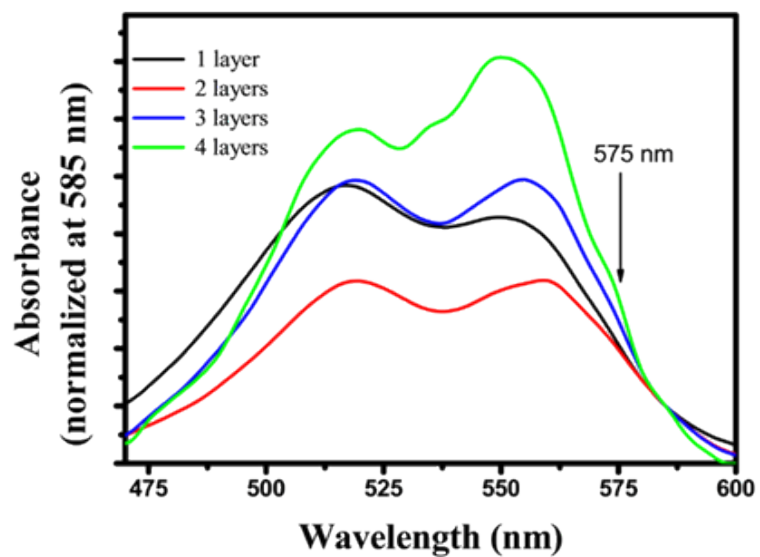

**Fig. S1.** Normalized UV-Vis absorption spectra of {PEI/GO/PEI/PSS/PyY/PSS}<sub>n</sub> multilayer film at various layers.

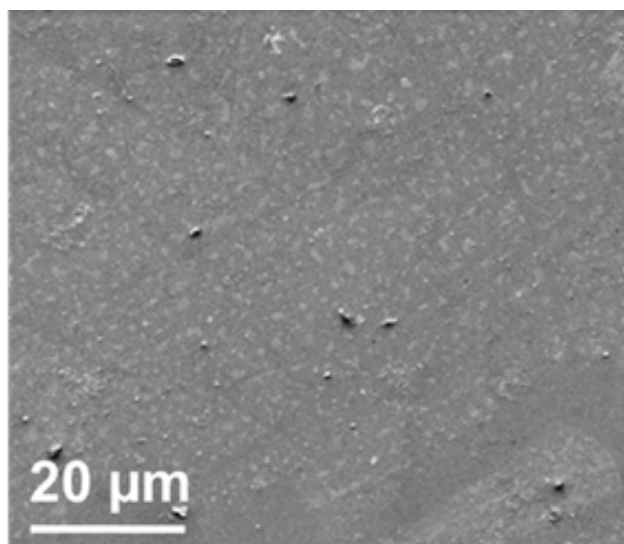

**Fig. S2.** The presence of GO sheets in the LbL film.
